# Supplementary material for: Wnt co-receptors Lrp5 and Lrp6 differentially mediate Wnt3a signaling in osteoblasts
Source: PubMed Central journal article supplement (PMC5703471; doi:10.1371/journal.pone.0188264), 2017-11-27
Supplement: pone.0188264.s002.pdf [file pone.0188264.s002.pdf]

**S1 Table. qPCR primers used in this study**

|                | <b><i>Forward</i></b>   | <b><i>Reverse</i></b> |
|----------------|-------------------------|-----------------------|
| <i>Axin2</i>   | ATGAGTAGCGCCGTGTTAGTG   | GGGCATAGGTTTGGTGGACT  |
| <i>Igf1bp2</i> | CAGACGCTACGCTGCTATCC    | CTCCCTCAGAGTGGTCGTCA  |
| <i>Lef1</i>    | ATCACCTACAGCGACGAGCAC   | TGGACATGGAAGTGTCGCCTG |
| <i>Ibh</i>     | CTGCTCTGACTATCTGAGATCGG | CAGCAACGGTCAAAGTCTGAT |
| <i>Gapdh</i>   | CCAATGTGTCCGTCGTGGATCT  | CCTCAGTGTAGCCCAAGATGC |
