# Supplementary material for: Wnt co-receptors Lrp5 and Lrp6 differentially mediate Wnt3a signaling in osteoblasts
Source: PubMed Central journal article supplement (PMC5703471; doi:10.1371/journal.pone.0188264), 2017-11-27
Supplement: pone.0188264.s004.pdf [file pone.0188264.s004.pdf]

**S3 Table. Key signaling pathways associated with Wnt3a targets**

| <b>Enriched pathways associated with up-regulated genes</b> |                     |            |
|-------------------------------------------------------------|---------------------|------------|
| <b>Pathway</b>                                              | <b>No. of genes</b> | <b>FDR</b> |
| <i>MAPK signaling pathway</i>                               | 17                  | 1.66E-04   |
| <i>Hippo signaling pathway</i>                              | 15                  | 9.43E-06   |
| <i>Cytokine-cytokine receptor interaction</i>               | 15                  | 2.15E-03   |
| <i>Wnt signaling pathway</i>                                | 14                  | 1.98E-05   |
| <i>TGF-beta signaling pathway</i>                           | 9                   | 7.47E-04   |
| <i>p53 signaling pathway</i>                                | 6                   | 2.80E-02   |
| <i>integrin signaling</i>                                   | 5                   | 1.47E-02   |
| <i>Signaling by BMP</i>                                     | 4                   | 2.03E-02   |

| <b>Enriched pathways associated with down-regulated genes</b> |                     |            |
|---------------------------------------------------------------|---------------------|------------|
| <b>Pathway</b>                                                | <b>No. of genes</b> | <b>FDR</b> |
| <i>Cytokine Signaling in Immune system</i>                    | 34                  | 4.44E-02   |
| <i>PI3K-Akt signaling pathway</i>                             | 24                  | 8.39E-04   |
| <i>Rap1 signaling pathway</i>                                 | 15                  | 1.63E-02   |
| <i>Integrin signalling pathway</i>                            | 13                  | 1.71E-02   |
| <i>Toll-like receptor signaling pathway</i>                   | 10                  | 1.61E-02   |
| <i>Interferon gamma signaling</i>                             | 9                   | 2.67E-02   |
| <i>EphrinA-EPHA pathway</i>                                   | 4                   | 2.17E-03   |
