# Supplementary material for: Wnt co-receptors Lrp5 and Lrp6 differentially mediate Wnt3a signaling in osteoblasts
Source: PubMed Central journal article supplement (PMC5703471; doi:10.1371/journal.pone.0188264), 2017-11-27
Supplement: pone.0188264.s005.pdf [file pone.0188264.s005.pdf]

**S4 Table. Enriched GO terms associated with Wnt3a targets**

| GO terms associated with up-regulated genes |                                                          |           |          |
|---------------------------------------------|----------------------------------------------------------|-----------|----------|
| GO ID                                       | Enriched Biological Process                              | No. genes | FDR      |
| GO:0042127                                  | regulation of cell proliferation                         | 74        | 8.32E-16 |
| GO:0048729                                  | tissue morphogenesis                                     | 48        | 4.25E-15 |
| GO:0048646                                  | anatomical structure formation involved in morphogenesis | 62        | 1.81E-14 |
| GO:0001944                                  | vasculature development                                  | 44        | 2.48E-14 |
| GO:0007167                                  | enzyme linked receptor protein signaling pathway         | 53        | 9.46E-14 |
| GO:0051094                                  | positive regulation of developmental process             | 61        | 1.03E-13 |
| GO:0001525                                  | angiogenesis                                             | 35        | 3.59E-13 |
| GO:0009719                                  | response to endogenous stimulus                          | 70        | 3.59E-13 |
| GO:0060485                                  | mesenchyme development                                   | 27        | 4.59E-13 |
| GO:0023057                                  | negative regulation of signaling                         | 58        | 2.73E-12 |
| GO:0048585                                  | negative regulation of response to stimulus              | 63        | 2.73E-12 |
| GO:0051270                                  | regulation of cellular component movement                | 46        | 2.75E-12 |
| GO:0048762                                  | mesenchymal cell differentiation                         | 23        | 3.58E-12 |
| GO:0040007                                  | growth                                                   | 52        | 3.58E-12 |
| GO:0010648                                  | negative regulation of cell communication                | 58        | 3.58E-12 |
| GO:0030334                                  | regulation of cell migration                             | 42        | 5.47E-12 |
| GO:0007267                                  | cell-cell signaling                                      | 55        | 7.67E-12 |
| GO:0048863                                  | stem cell differentiation                                | 27        | 8.20E-12 |
| GO:2000145                                  | regulation of cell motility                              | 43        | 9.86E-12 |
| GO:0040012                                  | regulation of locomotion                                 | 45        | 1.01E-11 |
| GO:0016477                                  | cell migration                                           | 56        | 1.50E-11 |
| GO:0009968                                  | negative regulation of signal transduction               | 53        | 1.52E-11 |
| GO:0090130                                  | tissue migration                                         | 24        | 1.95E-11 |
| GO:0071363                                  | cellular response to growth factor stimulus              | 38        | 1.95E-11 |
| GO:0009967                                  | positive regulation of signal transduction               | 60        | 2.51E-11 |
| GO:0070848                                  | response to growth factor                                | 38        | 6.73E-11 |
| GO:0006928                                  | movement of cell or subcellular component                | 68        | 7.07E-11 |
| GO:0045597                                  | positive regulation of cell differentiation              | 46        | 8.75E-11 |
| GO:0051674                                  | localization of cell                                     | 57        | 1.42E-10 |
| GO:0048870                                  | cell motility                                            | 57        | 1.42E-10 |
| GO:0051093                                  | negative regulation of developmental process             | 44        | 1.78E-10 |
| GO:0000904                                  | cell morphogenesis involved in differentiation           | 42        | 1.78E-10 |
| GO:0008284                                  | positive regulation of cell proliferation                | 44        | 2.45E-10 |
| GO:0014031                                  | mesenchymal cell development                             | 20        | 3.04E-10 |
| GO:0008285                                  | negative regulation of cell proliferation                | 38        | 3.33E-10 |
| GO:0040011                                  | locomotion                                               | 63        | 3.88E-10 |
| GO:0045595                                  | regulation of cell differentiation                       | 62        | 4.71E-10 |
| GO:0048864                                  | stem cell development                                    | 20        | 4.92E-10 |
| GO:0023056                                  | positive regulation of signaling                         | 61        | 5.54E-10 |
| GO:0010647                                  | positive regulation of cell communication                | 61        | 9.31E-10 |
| GO:0030335                                  | positive regulation of cell migration                    | 29        | 1.07E-09 |
| GO:0040017                                  | positive regulation of locomotion                        | 30        | 1.11E-09 |

|            |                                                                                               |    |          |
|------------|-----------------------------------------------------------------------------------------------|----|----------|
| GO:0010941 | <i>regulation of cell death</i>                                                               | 60 | 1.15E-09 |
| GO:2000147 | <i>positive regulation of cell motility</i>                                                   | 29 | 1.99E-09 |
| GO:0022610 | <i>biological adhesion</i>                                                                    | 57 | 2.12E-09 |
| GO:0007178 | <i>transmembrane receptor protein serine/threonine kinase signaling pathway</i>               | 25 | 2.46E-09 |
| GO:0051272 | <i>positive regulation of cellular component movement</i>                                     | 29 | 3.41E-09 |
| GO:0042981 | <i>regulation of apoptotic process</i>                                                        | 56 | 3.41E-09 |
| GO:0060393 | <i>regulation of pathway-restricted SMAD protein phosphorylation</i>                          | 12 | 4.01E-09 |
| GO:0007155 | <i>cell adhesion</i>                                                                          | 56 | 4.38E-09 |
| GO:0043067 | <i>regulation of programmed cell death</i>                                                    | 56 | 4.97E-09 |
| GO:0012501 | <i>programmed cell death</i>                                                                  | 65 | 4.97E-09 |
| GO:0001932 | <i>regulation of protein phosphorylation</i>                                                  | 53 | 4.97E-09 |
| GO:0060389 | <i>pathway-restricted SMAD protein phosphorylation</i>                                        | 12 | 6.73E-09 |
| GO:0006915 | <i>apoptotic process</i>                                                                      | 64 | 7.15E-09 |
| GO:0042325 | <i>regulation of phosphorylation</i>                                                          | 55 | 7.40E-09 |
| GO:0001763 | <i>morphogenesis of a branching structure</i>                                                 | 20 | 1.56E-08 |
| GO:0040008 | <i>regulation of growth</i>                                                                   | 35 | 1.86E-08 |
| GO:0014070 | <i>response to organic cyclic compound</i>                                                    | 43 | 2.61E-08 |
| GO:0090092 | <i>regulation of transmembrane receptor protein serine/threonine kinase signaling pathway</i> | 19 | 3.08E-08 |
| GO:0006468 | <i>protein phosphorylation</i>                                                                | 63 | 3.08E-08 |
| GO:0002040 | <i>sprouting angiogenesis</i>                                                                 | 12 | 3.25E-08 |
| GO:0030178 | <i>negative regulation of Wnt signaling pathway</i>                                           | 18 | 4.64E-08 |
| GO:0090287 | <i>regulation of cellular response to growth factor stimulus</i>                              | 20 | 4.94E-08 |
| GO:0009725 | <i>response to hormone</i>                                                                    | 42 | 5.31E-08 |
| GO:0010720 | <i>positive regulation of cell development</i>                                                | 30 | 5.31E-08 |
| GO:0051130 | <i>positive regulation of cellular component organization</i>                                 | 47 | 8.21E-08 |
| GO:0030111 | <i>regulation of Wnt signaling pathway</i>                                                    | 22 | 8.37E-08 |
| GO:0007169 | <i>transmembrane receptor protein tyrosine kinase signaling pathway</i>                       | 33 | 1.01E-07 |
| GO:0031399 | <i>regulation of protein modification process</i>                                             | 59 | 1.34E-07 |
| GO:0007389 | <i>pattern specification process</i>                                                          | 27 | 1.47E-07 |
| GO:0051247 | <i>positive regulation of protein metabolic process</i>                                       | 54 | 1.53E-07 |
| GO:0030324 | <i>lung development</i>                                                                       | 18 | 1.53E-07 |
| GO:0019220 | <i>regulation of phosphate metabolic process</i>                                              | 57 | 1.61E-07 |
| GO:0032989 | <i>cellular component morphogenesis</i>                                                       | 50 | 1.61E-07 |
| GO:0051216 | <i>cartilage development</i>                                                                  | 17 | 1.69E-07 |
| GO:0042327 | <i>positive regulation of phosphorylation</i>                                                 | 40 | 1.96E-07 |
| GO:0023014 | <i>signal transduction by protein phosphorylation</i>                                         | 39 | 1.96E-07 |
| GO:0030029 | <i>actin filament-based process</i>                                                           | 32 | 1.96E-07 |
| GO:0051174 | <i>regulation of phosphorus metabolic process</i>                                             | 57 | 1.96E-07 |
| GO:0043065 | <i>positive regulation of apoptotic process</i>                                               | 31 | 2.04E-07 |
| GO:0043068 | <i>positive regulation of programmed cell death</i>                                           | 31 | 2.47E-07 |
| GO:0031401 | <i>positive regulation of protein modification process</i>                                    | 45 | 2.55E-07 |
| GO:0010942 | <i>positive regulation of cell death</i>                                                      | 32 | 2.63E-07 |
| GO:0048705 | <i>skeletal system morphogenesis</i>                                                          | 18 | 2.67E-07 |

|            |                                                                     |    |          |
|------------|---------------------------------------------------------------------|----|----------|
| GO:0030278 | <i>regulation of ossification</i>                                   | 17 | 2.94E-07 |
| GO:1904035 | <i>regulation of epithelial cell apoptotic process</i>              | 11 | 3.01E-07 |
| GO:0060284 | <i>regulation of cell development</i>                               | 39 | 3.43E-07 |
| GO:0000902 | <i>cell morphogenesis</i>                                           | 47 | 3.72E-07 |
| GO:0060688 | <i>regulation of morphogenesis of a branching structure</i>         | 10 | 3.82E-07 |
| GO:0061448 | <i>connective tissue development</i>                                | 19 | 4.02E-07 |
| GO:0045765 | <i>regulation of angiogenesis</i>                                   | 18 | 4.30E-07 |
| GO:0071772 | <i>response to BMP</i>                                              | 15 | 5.37E-07 |
| GO:0071773 | <i>cellular response to BMP stimulus</i>                            | 15 | 5.37E-07 |
| GO:1902531 | <i>regulation of intracellular signal transduction</i>              | 56 | 5.72E-07 |
| GO:0072132 | <i>mesenchyme morphogenesis</i>                                     | 9  | 6.57E-07 |
| GO:0006935 | <i>chemotaxis</i>                                                   | 28 | 6.83E-07 |
| GO:0042330 | <i>taxis</i>                                                        | 28 | 7.31E-07 |
| GO:0003002 | <i>regionalization</i>                                              | 22 | 7.41E-07 |
| GO:0032270 | <i>positive regulation of cellular protein metabolic process</i>    | 50 | 7.77E-07 |
| GO:0001503 | <i>ossification</i>                                                 | 23 | 7.77E-07 |
| GO:0061061 | <i>muscle structure development</i>                                 | 30 | 8.47E-07 |
| GO:0010769 | <i>regulation of cell morphogenesis involved in differentiation</i> | 22 | 8.75E-07 |
| GO:0030855 | <i>epithelial cell differentiation</i>                              | 30 | 9.90E-07 |
| GO:0061035 | <i>regulation of cartilage development</i>                          | 10 | 1.06E-06 |
| GO:0030155 | <i>regulation of cell adhesion</i>                                  | 31 | 1.09E-06 |
| GO:0048608 | <i>reproductive structure development</i>                           | 25 | 1.18E-06 |
| GO:0010562 | <i>positive regulation of phosphorus metabolic process</i>          | 41 | 1.25E-06 |
| GO:0045937 | <i>positive regulation of phosphate metabolic process</i>           | 41 | 1.25E-06 |
| GO:0061458 | <i>reproductive system development</i>                              | 25 | 1.35E-06 |
| GO:0071407 | <i>cellular response to organic cyclic compound</i>                 | 27 | 1.44E-06 |
| GO:0016049 | <i>cell growth</i>                                                  | 27 | 1.48E-06 |
| GO:0043627 | <i>response to estrogen</i>                                         | 17 | 1.62E-06 |
| GO:0001501 | <i>skeletal system development</i>                                  | 26 | 1.73E-06 |
| GO:0003156 | <i>regulation of animal organ formation</i>                         | 8  | 2.04E-06 |
| GO:0045926 | <i>negative regulation of growth</i>                                | 18 | 2.25E-06 |
| GO:0033993 | <i>response to lipid</i>                                            | 38 | 2.37E-06 |
| GO:0048545 | <i>response to steroid hormone</i>                                  | 27 | 2.43E-06 |
| GO:0090090 | <i>negative regulation of canonical Wnt signaling pathway</i>       | 14 | 3.48E-06 |
| GO:0030036 | <i>actin cytoskeleton organization</i>                              | 27 | 3.78E-06 |
| GO:0010594 | <i>regulation of endothelial cell migration</i>                     | 12 | 4.17E-06 |
| GO:0072089 | <i>stem cell proliferation</i>                                      | 14 | 4.23E-06 |
| GO:0048589 | <i>developmental growth</i>                                         | 29 | 4.30E-06 |
| GO:0060537 | <i>muscle tissue development</i>                                    | 22 | 4.58E-06 |
| GO:0072078 | <i>nephron tubule morphogenesis</i>                                 | 10 | 5.21E-06 |
| GO:0045667 | <i>regulation of osteoblast differentiation</i>                     | 12 | 5.76E-06 |
| GO:0030198 | <i>extracellular matrix organization</i>                            | 20 | 6.05E-06 |
| GO:0031589 | <i>cell-substrate adhesion</i>                                      | 19 | 6.25E-06 |
| GO:0043062 | <i>extracellular structure organization</i>                         | 20 | 6.26E-06 |
| GO:0048666 | <i>neuron development</i>                                           | 39 | 6.50E-06 |
| GO:0051384 | <i>response to glucocorticoid</i>                                   | 14 | 7.51E-06 |
| GO:0045859 | <i>regulation of protein kinase activity</i>                        | 31 | 7.51E-06 |

|            |                                                                                                        |    |          |
|------------|--------------------------------------------------------------------------------------------------------|----|----------|
| GO:0032355 | <i>response to estradiol</i>                                                                           | 13 | 8.08E-06 |
| GO:0090100 | <i>positive regulation of transmembrane receptor protein serine/threonine kinase signaling pathway</i> | 11 | 8.57E-06 |

| <b>GO terms associated with down-regulated genes</b> |                                                                |                  |            |
|------------------------------------------------------|----------------------------------------------------------------|------------------|------------|
| <b>GO ID</b>                                         | <b>Enriched Biological Process</b>                             | <b>No. genes</b> | <b>FDR</b> |
| GO:0022610                                           | <i>biological adhesion</i>                                     | 93               | 1.44E-14   |
| GO:0007155                                           | <i>cell adhesion</i>                                           | 89               | 4.36E-13   |
| GO:0030198                                           | <i>extracellular matrix organization</i>                       | 39               | 6.86E-13   |
| GO:0043062                                           | <i>extracellular structure organization</i>                    | 39               | 6.86E-13   |
| GO:0048514                                           | <i>blood vessel morphogenesis</i>                              | 48               | 2.09E-12   |
| GO:0001525                                           | <i>angiogenesis</i>                                            | 42               | 3.05E-11   |
| GO:1903034                                           | <i>regulation of response to wounding</i>                      | 42               | 4.66E-11   |
| GO:0001568                                           | <i>blood vessel development</i>                                | 50               | 4.66E-11   |
| GO:0001944                                           | <i>vasculature development</i>                                 | 51               | 4.85E-11   |
| GO:0040011                                           | <i>locomotion</i>                                              | 90               | 5.57E-11   |
| GO:0032101                                           | <i>regulation of response to external stimulus</i>             | 64               | 7.75E-11   |
| GO:0051241                                           | <i>negative regulation of multicellular organismal process</i> | 68               | 9.4E-11    |
| GO:0016477                                           | <i>cell migration</i>                                          | 74               | 1.15E-10   |
| GO:0006952                                           | <i>defense response</i>                                        | 86               | 1.15E-10   |
| GO:0080134                                           | <i>regulation of response to stress</i>                        | 83               | 1.87E-10   |
| GO:0051674                                           | <i>localization of cell</i>                                    | 77               | 3.87E-10   |
| GO:0048870                                           | <i>cell motility</i>                                           | 77               | 3.87E-10   |
| GO:0030334                                           | <i>regulation of cell migration</i>                            | 51               | 7.26E-10   |
| GO:0009611                                           | <i>response to wounding</i>                                    | 59               | 1.67E-09   |
| GO:0006928                                           | <i>movement of cell or subcellular component</i>               | 90               | 2.47E-09   |
| GO:0048585                                           | <i>negative regulation of response to stimulus</i>             | 78               | 2.49E-09   |
| GO:2000145                                           | <i>regulation of cell motility</i>                             | 51               | 6.98E-09   |
| GO:0031347                                           | <i>regulation of defense response</i>                          | 52               | 6.98E-09   |
| GO:0002682                                           | <i>regulation of immune system process</i>                     | 76               | 9.78E-09   |
| GO:0040012                                           | <i>regulation of locomotion</i>                                | 53               | 1.49E-08   |
| GO:0045087                                           | <i>innate immune response</i>                                  | 52               | 1.9E-08    |
| GO:0043207                                           | <i>response to external biotic stimulus</i>                    | 57               | 2.19E-08   |
| GO:0051270                                           | <i>regulation of cellular component movement</i>               | 52               | 3.1E-08    |
| GO:0009607                                           | <i>response to biotic stimulus</i>                             | 58               | 3.43E-08   |
| GO:0002237                                           | <i>response to molecule of bacterial origin</i>                | 31               | 4.29E-08   |
| GO:0001503                                           | <i>ossification</i>                                            | 33               | 4.97E-08   |
| GO:0006955                                           | <i>immune response</i>                                         | 76               | 5.41E-08   |
| GO:0009967                                           | <i>positive regulation of signal transduction</i>              | 73               | 6.6E-08    |
| GO:0010647                                           | <i>positive regulation of cell communication</i>               | 79               | 8.59E-08   |
| GO:0023056                                           | <i>positive regulation of signaling</i>                        | 78               | 1.08E-07   |
| GO:0048589                                           | <i>developmental growth</i>                                    | 43               | 2E-07      |
| GO:0006935                                           | <i>chemotaxis</i>                                              | 39               | 2.24E-07   |
| GO:0030155                                           | <i>regulation of cell adhesion</i>                             | 44               | 2.36E-07   |

|            |                                                                 |    |          |
|------------|-----------------------------------------------------------------|----|----------|
| GO:0042330 | <i>taxis</i>                                                    | 39 | 2.36E-07 |
| GO:0051240 | <i>positive regulation of multicellular organismal process</i>  | 75 | 3.03E-07 |
| GO:0006954 | <i>inflammatory response</i>                                    | 44 | 3.03E-07 |
| GO:0009617 | <i>response to bacterium</i>                                    | 39 | 4.13E-07 |
| GO:0001816 | <i>cytokine production</i>                                      | 43 | 5.56E-07 |
| GO:0040007 | <i>growth</i>                                                   | 57 | 5.92E-07 |
| GO:0050727 | <i>regulation of inflammatory response</i>                      | 28 | 7.12E-07 |
| GO:1902533 | <i>positive regulation of intracellular signal transduction</i> | 52 | 8.16E-07 |
| GO:0032722 | <i>positive regulation of chemokine production</i>              | 12 | 8.31E-07 |
| GO:0032103 | <i>positive regulation of response to external stimulus</i>     | 27 | 1.2E-06  |
| GO:0051093 | <i>negative regulation of developmental process</i>             | 50 | 1.2E-06  |
| GO:0030335 | <i>positive regulation of cell migration</i>                    | 32 | 1.31E-06 |
| GO:0002684 | <i>positive regulation of immune system process</i>             | 52 | 1.31E-06 |
| GO:0009968 | <i>negative regulation of signal transduction</i>               | 59 | 1.31E-06 |
| GO:0040017 | <i>positive regulation of locomotion</i>                        | 33 | 1.82E-06 |
| GO:0001817 | <i>regulation of cytokine production</i>                        | 39 | 1.98E-06 |
| GO:0001501 | <i>skeletal system development</i>                              | 35 | 2.09E-06 |
| GO:2000147 | <i>positive regulation of cell motility</i>                     | 32 | 2.27E-06 |
| GO:0032496 | <i>response to lipopolysaccharide</i>                           | 27 | 2.35E-06 |
| GO:0031589 | <i>cell-substrate adhesion</i>                                  | 26 | 2.67E-06 |
| GO:0050678 | <i>regulation of epithelial cell proliferation</i>              | 26 | 2.8E-06  |
| GO:0032642 | <i>regulation of chemokine production</i>                       | 13 | 3.51E-06 |
| GO:0002687 | <i>positive regulation of leukocyte migration</i>               | 16 | 3.58E-06 |
| GO:0051272 | <i>positive regulation of cellular component movement</i>       | 32 | 3.69E-06 |
| GO:0001818 | <i>negative regulation of cytokine production</i>               | 22 | 3.74E-06 |
| GO:0045088 | <i>regulation of innate immune response</i>                     | 28 | 3.74E-06 |
| GO:0042127 | <i>regulation of cell proliferation</i>                         | 73 | 3.93E-06 |
| GO:0031349 | <i>positive regulation of defense response</i>                  | 30 | 4.57E-06 |
| GO:0033993 | <i>response to lipid</i>                                        | 52 | 4.57E-06 |
| GO:0045824 | <i>negative regulation of innate immune response</i>            | 10 | 4.94E-06 |
| GO:1901700 | <i>response to oxygen-containing compound</i>                   | 71 | 4.94E-06 |
| GO:1903036 | <i>positive regulation of response to wounding</i>              | 19 | 4.94E-06 |
| GO:0070374 | <i>positive regulation of ERK1 and ERK2 cascade</i>             | 19 | 5.78E-06 |
| GO:0045596 | <i>negative regulation of cell differentiation</i>              | 40 | 6.42E-06 |
| GO:0023057 | <i>negative regulation of signaling</i>                         | 61 | 6.66E-06 |
| GO:0032602 | <i>chemokine production</i>                                     | 13 | 6.78E-06 |
| GO:0050776 | <i>regulation of immune response</i>                            | 47 | 8.32E-06 |
| GO:0071346 | <i>cellular response to interferon-gamma</i>                    | 16 | 9.16E-06 |
| GO:0002526 | <i>acute inflammatory response</i>                              | 17 | 9.84E-06 |
| GO:0010648 | <i>negative regulation of cell communication</i>                | 61 | 9.86E-06 |
| GO:0048646 | <i>anatomical structure formation involved in morphogenesis</i> | 60 | 1.03E-05 |
| GO:0060349 | <i>bone morphogenesis</i>                                       | 13 | 1.07E-05 |
| GO:0050920 | <i>regulation of chemotaxis</i>                                 | 19 | 1.07E-05 |
| GO:0010721 | <i>negative regulation of cell development</i>                  | 26 | 1.24E-05 |
| GO:0044236 | <i>multicellular organism metabolic process</i>                 | 16 | 1.26E-05 |
| GO:0034341 | <i>response to interferon-gamma</i>                             | 17 | 1.31E-05 |
| GO:0044259 | <i>multicellular organismal macromolecule metabolic process</i> | 15 | 1.32E-05 |

|            |                                                                 |    |          |
|------------|-----------------------------------------------------------------|----|----------|
| GO:0048608 | <i>reproductive structure development</i>                       | 31 | 1.65E-05 |
| GO:0030278 | <i>regulation of ossification</i>                               | 19 | 1.71E-05 |
| GO:0050900 | <i>leukocyte migration</i>                                      | 27 | 1.79E-05 |
| GO:0061458 | <i>reproductive system development</i>                          | 31 | 1.89E-05 |
| GO:0050729 | <i>positive regulation of inflammatory response</i>             | 15 | 2.07E-05 |
| GO:0048729 | <i>tissue morphogenesis</i>                                     | 41 | 2.22E-05 |
| GO:0002697 | <i>regulation of immune effector process</i>                    | 30 | 2.25E-05 |
| GO:0048699 | <i>generation of neurons</i>                                    | 66 | 2.29E-05 |
| GO:0002252 | <i>immune effector process</i>                                  | 44 | 2.37E-05 |
| GO:0043410 | <i>positive regulation of MAPK cascade</i>                      | 32 | 2.65E-05 |
| GO:0001763 | <i>morphogenesis of a branching structure</i>                   | 20 | 3.21E-05 |
| GO:0002685 | <i>regulation of leukocyte migration</i>                        | 17 | 3.42E-05 |
| GO:0046903 | <i>secretion</i>                                                | 56 | 3.45E-05 |
| GO:0008284 | <i>positive regulation of cell proliferation</i>                | 46 | 3.53E-05 |
| GO:0045765 | <i>regulation of angiogenesis</i>                               | 20 | 3.54E-05 |
| GO:0050730 | <i>regulation of peptidyl-tyrosine phosphorylation</i>          | 20 | 3.74E-05 |
| GO:0032963 | <i>collagen metabolic process</i>                               | 14 | 3.94E-05 |
| GO:1901342 | <i>regulation of vasculature development</i>                    | 21 | 4.11E-05 |
| GO:0044093 | <i>positive regulation of molecular function</i>                | 76 | 4.21E-05 |
| GO:0060828 | <i>regulation of canonical Wnt signaling pathway</i>            | 20 | 4.57E-05 |
| GO:0001649 | <i>osteoblast differentiation</i>                               | 19 | 4.73E-05 |
| GO:0045595 | <i>regulation of cell differentiation</i>                       | 70 | 4.78E-05 |
| GO:0010810 | <i>regulation of cell-substrate adhesion</i>                    | 17 | 5.65E-05 |
| GO:0071345 | <i>cellular response to cytokine stimulus</i>                   | 38 | 6.26E-05 |
| GO:0033002 | <i>muscle cell proliferation</i>                                | 17 | 0.000069 |
| GO:0002683 | <i>negative regulation of immune system process</i>             | 27 | 7.24E-05 |
| GO:0030111 | <i>regulation of Wnt signaling pathway</i>                      | 23 | 7.38E-05 |
| GO:0050921 | <i>positive regulation of chemotaxis</i>                        | 14 | 7.67E-05 |
| GO:0001101 | <i>response to acid chemical</i>                                | 25 | 7.78E-05 |
| GO:0045785 | <i>positive regulation of cell adhesion</i>                     | 27 | 8.59E-05 |
| GO:0023014 | <i>signal transduction by protein phosphorylation</i>           | 46 | 8.73E-05 |
| GO:0048659 | <i>smooth muscle cell proliferation</i>                         | 14 | 9.56E-05 |
| GO:0032940 | <i>secretion by cell</i>                                        | 50 | 9.8E-05  |
| GO:0070371 | <i>ERK1 and ERK2 cascade</i>                                    | 21 | 0.000112 |
| GO:1902531 | <i>regulation of intracellular signal transduction</i>          | 71 | 0.000113 |
| GO:0043408 | <i>regulation of MAPK cascade</i>                               | 38 | 0.000114 |
| GO:0050679 | <i>positive regulation of epithelial cell proliferation</i>     | 16 | 0.000115 |
| GO:0010941 | <i>regulation of cell death</i>                                 | 67 | 0.000119 |
| GO:0051094 | <i>positive regulation of developmental process</i>             | 57 | 0.000123 |
| GO:0018108 | <i>peptidyl-tyrosine phosphorylation</i>                        | 25 | 0.000129 |
| GO:0050731 | <i>positive regulation of peptidyl-tyrosine phosphorylation</i> | 16 | 0.00013  |
| GO:0071396 | <i>cellular response to lipid</i>                               | 32 | 0.000137 |
| GO:0018212 | <i>peptidyl-tyrosine modification</i>                           | 25 | 0.000139 |
| GO:0060350 | <i>endochondral bone morphogenesis</i>                          | 9  | 0.000151 |
| GO:2000027 | <i>regulation of organ morphogenesis</i>                        | 20 | 0.000154 |
| GO:0032490 | <i>detection of molecule of bacterial origin</i>                | 5  | 0.000157 |
| GO:0070372 | <i>regulation of ERK1 and ERK2 cascade</i>                      | 20 | 0.000161 |

|            |                                                                            |    |          |
|------------|----------------------------------------------------------------------------|----|----------|
| GO:0001934 | <i>positive regulation of protein phosphorylation</i>                      | 45 | 0.000163 |
| GO:0048771 | <i>tissue remodeling</i>                                                   | 16 | 0.000163 |
| GO:0002009 | <i>morphogenesis of an epithelium</i>                                      | 33 | 0.000178 |
| GO:0031214 | <i>biomineral tissue development</i>                                       | 14 | 0.000179 |
| GO:0032680 | <i>regulation of tumor necrosis factor production</i>                      | 13 | 0.000179 |
| GO:0045667 | <i>regulation of osteoblast differentiation</i>                            | 13 | 0.000179 |
| GO:0030199 | <i>collagen fibril organization</i>                                        | 8  | 0.00018  |
| GO:0003006 | <i>developmental process involved in reproduction</i>                      | 37 | 0.000198 |
| GO:0050778 | <i>positive regulation of immune response</i>                              | 35 | 0.000203 |
| GO:0042327 | <i>positive regulation of phosphorylation</i>                              | 46 | 0.000215 |
| GO:0042981 | <i>regulation of apoptotic process</i>                                     | 62 | 0.000215 |
| GO:1903555 | <i>regulation of tumor necrosis factor superfamily cytokine production</i> | 13 | 0.000223 |
| GO:0048705 | <i>skeletal system morphogenesis</i>                                       | 18 | 0.00023  |
| GO:0044243 | <i>multicellular organismal catabolic process</i>                          | 10 | 0.000233 |
| GO:0034097 | <i>response to cytokine</i>                                                | 40 | 0.00024  |
| GO:0050918 | <i>positive chemotaxis</i>                                                 | 9  | 0.000241 |
| GO:0030282 | <i>bone mineralization</i>                                                 | 12 | 0.00025  |
| GO:0098609 | <i>cell-cell adhesion</i>                                                  | 45 | 0.000252 |
| GO:0042592 | <i>homeostatic process</i>                                                 | 69 | 0.000259 |
| GO:0071295 | <i>cellular response to vitamin</i>                                        | 7  | 0.000259 |
| GO:1900046 | <i>regulation of hemostasis</i>                                            | 11 | 0.000261 |
| GO:0045089 | <i>positive regulation of innate immune response</i>                       | 21 | 0.000264 |
| GO:0048660 | <i>regulation of smooth muscle cell proliferation</i>                      | 13 | 0.000268 |
| GO:0071706 | <i>tumor necrosis factor superfamily cytokine production</i>               | 13 | 0.000268 |
| GO:0032757 | <i>positive regulation of interleukin-8 production</i>                     | 8  | 0.000269 |
| GO:0043067 | <i>regulation of programmed cell death</i>                                 | 62 | 0.000278 |
| GO:0014066 | <i>regulation of phosphatidylinositol 3-kinase signaling</i>               | 14 | 0.000292 |
| GO:0003416 | <i>endochondral bone growth</i>                                            | 6  | 0.000308 |
| GO:0060348 | <i>bone development</i>                                                    | 16 | 0.000311 |
| GO:0042325 | <i>regulation of phosphorylation</i>                                       | 61 | 0.000315 |
| GO:0051336 | <i>regulation of hydrolase activity</i>                                    | 57 | 0.000325 |
| GO:0050663 | <i>cytokine secretion</i>                                                  | 16 | 0.000325 |
| GO:0032677 | <i>regulation of interleukin-8 production</i>                              | 9  | 0.000329 |
| GO:0006915 | <i>apoptotic process</i>                                                   | 73 | 0.00033  |
| GO:0010628 | <i>positive regulation of gene expression</i>                              | 72 | 0.000337 |
| GO:0042116 | <i>macrophage activation</i>                                               | 9  | 0.000363 |
| GO:0010562 | <i>positive regulation of phosphorus metabolic process</i>                 | 49 | 0.000363 |
| GO:0045937 | <i>positive regulation of phosphate metabolic process</i>                  | 49 | 0.000363 |
| GO:0043085 | <i>positive regulation of catalytic activity</i>                           | 63 | 0.000368 |
| GO:1901701 | <i>cellular response to oxygen-containing compound</i>                     | 45 | 0.000373 |
| GO:0006024 | <i>glycosaminoglycan biosynthetic process</i>                              | 12 | 0.000373 |
