# Supplementary material for: Wnt co-receptors Lrp5 and Lrp6 differentially mediate Wnt3a signaling in osteoblasts
Source: PubMed Central journal article supplement (PMC5703471; doi:10.1371/journal.pone.0188264), 2017-11-27
Supplement: pone.0188264.s008.pdf [file pone.0188264.s008.pdf]

**S7 Table. Top 50 enriched GO terms associated with genes differentially expressed in *Lrp5*<sup>KO</sup> osteoblasts compared to *WT* osteoblasts**

| <b>Genes up-regulated in <i>Lrp5</i><sup>KO</sup> Osteoblasts</b> |                                                      |                  |            |
|-------------------------------------------------------------------|------------------------------------------------------|------------------|------------|
| <b>GO ID</b>                                                      | <b>Enriched Biological Process</b>                   | <b>No. genes</b> | <b>FDR</b> |
| GO:0006952                                                        | defense response                                     | 39               | 1.16E-11   |
| GO:0080134                                                        | regulation of response to stress                     | 37               | 4.97E-11   |
| GO:0002684                                                        | positive regulation of immune system process         | 29               | 1.25E-10   |
| GO:0006954                                                        | inflammatory response                                | 25               | 1.61E-10   |
| GO:0031347                                                        | regulation of defense response                       | 25               | 2.99E-09   |
| GO:0050727                                                        | regulation of inflammatory response                  | 17               | 5.48E-09   |
| GO:0032101                                                        | regulation of response to external stimulus          | 27               | 5.79E-09   |
| GO:1903034                                                        | regulation of response to wounding                   | 19               | 9.18E-09   |
| GO:0032103                                                        | positive regulation of response to external stimulus | 16               | 2.16E-08   |
| GO:0051270                                                        | regulation of cellular component movement            | 24               | 2.69E-08   |
| GO:0006955                                                        | immune response                                      | 32               | 3.42E-08   |
| GO:0030334                                                        | regulation of cell migration                         | 22               | 4.70E-08   |
| GO:0002682                                                        | regulation of immune system process                  | 31               | 4.70E-08   |
| GO:0030335                                                        | positive regulation of cell migration                | 17               | 1.34E-07   |
| GO:2000145                                                        | regulation of cell motility                          | 22               | 1.34E-07   |
| GO:0016477                                                        | cell migration                                       | 28               | 1.34E-07   |
| GO:2000147                                                        | positive regulation of cell motility                 | 17               | 1.88E-07   |
| GO:0051674                                                        | localization of cell                                 | 29               | 2.01E-07   |
| GO:0048870                                                        | cell motility                                        | 29               | 2.01E-07   |
| GO:0051272                                                        | positive regulation of cellular component movement   | 17               | 2.36E-07   |
| GO:0040017                                                        | positive regulation of locomotion                    | 17               | 2.81E-07   |
| GO:0031349                                                        | positive regulation of defense response              | 16               | 4.14E-07   |
| GO:0040012                                                        | regulation of locomotion                             | 22               | 4.68E-07   |
| GO:0002687                                                        | positive regulation of leukocyte migration           | 10               | 4.76E-07   |
| GO:0050729                                                        | positive regulation of inflammatory response         | 10               | 5.71E-07   |
| GO:0009611                                                        | response to wounding                                 | 23               | 5.98E-07   |
| GO:0002685                                                        | regulation of leukocyte migration                    | 11               | 6.52E-07   |
| GO:0050900                                                        | leukocyte migration                                  | 15               | 6.52E-07   |
| GO:1903036                                                        | positive regulation of response to wounding          | 11               | 1.22E-06   |
| GO:0030595                                                        | leukocyte chemotaxis                                 | 11               | 2.24E-06   |
| GO:0040011                                                        | locomotion                                           | 30               | 2.49E-06   |
| GO:0060326                                                        | cell chemotaxis                                      | 12               | 2.64E-06   |
| GO:0002690                                                        | positive regulation of leukocyte chemotaxis          | 8                | 3.24E-06   |
| GO:0006928                                                        | movement of cell or subcellular component            | 31               | 3.80E-06   |
| GO:0097529                                                        | myeloid leukocyte migration                          | 10               | 5.77E-06   |
| GO:0046849                                                        | bone remodeling                                      | 8                | 6.00E-06   |
| GO:0046903                                                        | secretion                                            | 24               | 7.94E-06   |
| GO:0009612                                                        | response to mechanical stimulus                      | 11               | 9.63E-06   |
| GO:0002688                                                        | regulation of leukocyte chemotaxis                   | 8                | 1.53E-05   |

|            |                                                                 |    |          |
|------------|-----------------------------------------------------------------|----|----------|
| GO:0032940 | <i>secretion by cell</i>                                        | 22 | 1.62E-05 |
| GO:1901700 | <i>response to oxygen-containing compound</i>                   | 27 | 2.25E-05 |
| GO:0032963 | <i>collagen metabolic process</i>                               | 8  | 3.90E-05 |
| GO:0042127 | <i>regulation of cell proliferation</i>                         | 27 | 4.03E-05 |
| GO:0044259 | <i>multicellular organismal macromolecule metabolic process</i> | 8  | 5.06E-05 |
| GO:0010035 | <i>response to inorganic substance</i>                          | 15 | 5.06E-05 |
| GO:0050921 | <i>positive regulation of chemotaxis</i>                        | 8  | 5.78E-05 |
| GO:0048771 | <i>tissue remodeling</i>                                        | 9  | 6.85E-05 |
| GO:0002548 | <i>monocyte chemotaxis</i>                                      | 6  | 8.97E-05 |
| GO:0009607 | <i>response to biotic stimulus</i>                              | 20 | 9.05E-05 |
| GO:0045087 | <i>innate immune response</i>                                   | 18 | 9.32E-05 |
