# Supplementary material for: Wnt co-receptors Lrp5 and Lrp6 differentially mediate Wnt3a signaling in osteoblasts
Source: PubMed Central journal article supplement (PMC5703471; doi:10.1371/journal.pone.0188264), 2017-11-27
Supplement: pone.0188264.s009.pdf [file pone.0188264.s009.pdf]

**S8 Table. Top 50 enriched GO terms associated with genes differentially expressed in *Lrp6*<sup>KO</sup> osteoblasts compared to *Lrp6*<sup>fl/fl</sup> +TMX**

| Genes up-regulated in <i>Lrp6</i> <sup>KO</sup> Osteoblasts |                                                      |           |          |
|-------------------------------------------------------------|------------------------------------------------------|-----------|----------|
| GO ID                                                       | Enriched Biological Process                          | No. genes | FDR      |
| GO:0060337                                                  | type I interferon signaling pathway                  | 12        | 6.44E-09 |
| GO:0071357                                                  | cellular response to type I interferon               | 12        | 6.44E-09 |
| GO:0034340                                                  | response to type I interferon                        | 12        | 7.70E-09 |
| GO:0045087                                                  | innate immune response                               | 30        | 1.32E-08 |
| GO:0006955                                                  | immune response                                      | 40        | 7.43E-08 |
| GO:0006952                                                  | defense response                                     | 41        | 7.43E-08 |
| GO:0009615                                                  | response to virus                                    | 19        | 1.24E-06 |
| GO:0044419                                                  | interspecies interaction between organisms           | 26        | 1.24E-06 |
| GO:0044403                                                  | symbiosis, encompassing mutualism through parasitism | 26        | 1.24E-06 |
| GO:0035456                                                  | response to interferon-beta                          | 7         | 1.41E-06 |
| GO:0051607                                                  | defense response to virus                            | 17        | 1.41E-06 |
| GO:0030198                                                  | extracellular matrix organization                    | 17        | 1.99E-06 |
| GO:0043062                                                  | extracellular structure organization                 | 17        | 1.99E-06 |
| GO:0034341                                                  | response to interferon-gamma                         | 12        | 3.02E-06 |
| GO:0002682                                                  | regulation of immune system process                  | 35        | 5.10E-06 |
| GO:0009607                                                  | response to biotic stimulus                          | 28        | 5.93E-06 |
| GO:0002252                                                  | immune effector process                              | 25        | 8.22E-06 |
| GO:0043207                                                  | response to external biotic stimulus                 | 27        | 8.39E-06 |
| GO:0051707                                                  | response to other organism                           | 27        | 8.39E-06 |
| GO:0032606                                                  | type I interferon production                         | 10        | 1.03E-05 |
| GO:0071345                                                  | cellular response to cytokine stimulus               | 22        | 2.04E-05 |
| GO:0098542                                                  | defense response to other organism                   | 20        | 2.85E-05 |
| GO:0071346                                                  | cellular response to interferon-gamma                | 10        | 4.14E-05 |
| GO:0034097                                                  | response to cytokine                                 | 23        | 5.44E-05 |
| GO:1902988                                                  | neurofibrillary tangle assembly                      | 3         | 7.40E-05 |
| GO:1902996                                                  | regulation of neurofibrillary tangle assembly        | 3         | 7.40E-05 |
| GO:0032479                                                  | regulation of type I interferon production           | 9         | 7.55E-05 |
| GO:0035458                                                  | cellular response to interferon-beta                 | 5         | 1.36E-04 |
| GO:0032480                                                  | negative regulation of type I interferon production  | 6         | 1.66E-04 |
| GO:0016032                                                  | viral process                                        | 21        | 1.66E-04 |
| GO:0050776                                                  | regulation of immune response                        | 23        | 1.84E-04 |
| GO:0044764                                                  | multi-organism cellular process                      | 21        | 2.07E-04 |
| GO:0040011                                                  | locomotion                                           | 34        | 2.09E-04 |
| GO:1902947                                                  | regulation of tau-protein kinase activity            | 3         | 2.19E-04 |
| GO:0001501                                                  | skeletal system development                          | 17        | 2.19E-04 |
| GO:0031347                                                  | regulation of defense response                       | 21        | 4.63E-04 |
| GO:0080134                                                  | regulation of response to stress                     | 31        | 5.59E-04 |
| GO:0001816                                                  | cytokine production                                  | 19        | 5.67E-04 |
| GO:0002684                                                  | positive regulation of immune system process         | 23        | 5.74E-04 |
| GO:0006915                                                  | apoptotic process                                    | 35        | 6.19E-04 |

|            |                                                            |    |          |
|------------|------------------------------------------------------------|----|----------|
| GO:0002697 | regulation of immune effector process                      | 15 | 7.28E-04 |
| GO:0012501 | programmed cell death                                      | 35 | 8.17E-04 |
| GO:1902430 | negative regulation of amyloid-beta formation              | 3  | 8.71E-04 |
| GO:0051701 | interaction with host                                      | 9  | 1.11E-03 |
| GO:0019221 | cytokine-mediated signaling pathway                        | 16 | 1.22E-03 |
| GO:0045088 | regulation of innate immune response                       | 13 | 1.22E-03 |
| GO:0060338 | regulation of type I interferon-mediated signaling pathway | 5  | 1.42E-03 |
| GO:0030574 | collagen catabolic process                                 | 6  | 1.42E-03 |
| GO:0001817 | regulation of cytokine production                          | 17 | 1.53E-03 |
| GO:0032647 | regulation of interferon-alpha production                  | 4  | 1.99E-03 |

| <b>Genes down-regulated in <i>Lrp6</i><sup>KO</sup> Osteoblasts</b> |                                                          |                  |            |
|---------------------------------------------------------------------|----------------------------------------------------------|------------------|------------|
| <b>GO ID</b>                                                        | <b>Enriched Biological Process</b>                       | <b>No. genes</b> | <b>FDR</b> |
| GO:0030049                                                          | muscle filament sliding                                  | 13               | 4.73E-19   |
| GO:0033275                                                          | actin-myosin filament sliding                            | 13               | 4.73E-19   |
| GO:0061061                                                          | muscle structure development                             | 28               | 8.17E-19   |
| GO:0042692                                                          | muscle cell differentiation                              | 23               | 1.34E-17   |
| GO:0003012                                                          | muscle system process                                    | 23               | 2.81E-17   |
| GO:0051146                                                          | striated muscle cell differentiation                     | 20               | 5.62E-17   |
| GO:0006936                                                          | muscle contraction                                       | 21               | 8.95E-17   |
| GO:0055001                                                          | muscle cell development                                  | 17               | 1.66E-16   |
| GO:0070252                                                          | actin-mediated cell contraction                          | 14               | 9.96E-16   |
| GO:0055002                                                          | striated muscle cell development                         | 16               | 1.03E-15   |
| GO:0007517                                                          | muscle organ development                                 | 21               | 1.28E-15   |
| GO:0014706                                                          | striated muscle tissue development                       | 20               | 1.32E-14   |
| GO:0030048                                                          | actin filament-based movement                            | 14               | 1.32E-14   |
| GO:0060537                                                          | muscle tissue development                                | 20               | 2.85E-14   |
| GO:0030239                                                          | myofibril assembly                                       | 11               | 1.16E-13   |
| GO:0006941                                                          | striated muscle contraction                              | 14               | 3.95E-13   |
| GO:0045214                                                          | sarcomere organization                                   | 9                | 5.56E-12   |
| GO:0031032                                                          | actomyosin structure organization                        | 12               | 2.58E-10   |
| GO:0030029                                                          | actin filament-based process                             | 20               | 2.58E-10   |
| GO:0048738                                                          | cardiac muscle tissue development                        | 12               | 6.64E-09   |
| GO:0060047                                                          | heart contraction                                        | 13               | 7.89E-09   |
| GO:0003015                                                          | heart process                                            | 13               | 8.62E-09   |
| GO:0048646                                                          | anatomical structure formation involved in morphogenesis | 24               | 1.37E-08   |
| GO:0043501                                                          | skeletal muscle adaptation                               | 6                | 8.65E-08   |
| GO:0060048                                                          | cardiac muscle contraction                               | 9                | 1.29E-07   |
| GO:0072359                                                          | circulatory system development                           | 20               | 3.93E-07   |
| GO:0072358                                                          | cardiovascular system development                        | 20               | 3.93E-07   |
| GO:0008015                                                          | blood circulation                                        | 15               | 4.26E-07   |
| GO:0003013                                                          | circulatory system process                               | 15               | 4.42E-07   |
| GO:0010927                                                          | cellular component assembly involved in morphogenesis    | 12               | 7.15E-07   |
| GO:0007507                                                          | heart development                                        | 15               | 8.90E-07   |

|            |                                                           |    |          |
|------------|-----------------------------------------------------------|----|----------|
| GO:0003009 | skeletal muscle contraction                               | 6  | 1.27E-06 |
| GO:0014888 | striated muscle adaptation                                | 6  | 2.14E-06 |
| GO:0014902 | myotube differentiation                                   | 8  | 2.18E-06 |
| GO:0006928 | movement of cell or subcellular component                 | 25 | 2.97E-06 |
| GO:0045445 | myoblast differentiation                                  | 7  | 3.53E-06 |
| GO:0007519 | skeletal muscle tissue development                        | 9  | 3.84E-06 |
| GO:0044057 | regulation of system process                              | 14 | 4.65E-06 |
| GO:0050881 | musculoskeletal movement                                  | 6  | 4.65E-06 |
| GO:0050879 | multicellular organismal movement                         | 6  | 4.65E-06 |
| GO:0030036 | actin cytoskeleton organization                           | 14 | 4.90E-06 |
| GO:0060538 | skeletal muscle organ development                         | 9  | 5.28E-06 |
| GO:0035051 | cardiocyte differentiation                                | 8  | 6.20E-06 |
| GO:0045844 | positive regulation of striated muscle tissue development | 6  | 1.04E-05 |
| GO:0048636 | positive regulation of muscle organ development           | 6  | 1.04E-05 |
| GO:0048747 | muscle fiber development                                  | 6  | 1.09E-05 |
| GO:1901863 | positive regulation of muscle tissue development          | 6  | 1.09E-05 |
| GO:0090257 | regulation of muscle system process                       | 9  | 1.09E-05 |
| GO:0006937 | regulation of muscle contraction                          | 8  | 1.34E-05 |
| GO:0009887 | animal organ morphogenesis                                | 18 | 1.67E-05 |
